# Supplementary material for: A reusable fluorescent biosensor based on a morphology-controlled ZIF-8⊃FAM-DNA film
Source: Royal Society of Chemistry journal article supplement (doi:10.1039/d6an00017g), 2026-01-01
Supplement: d6an00017g1.pdf [file d6an00017g1.pdf]

# Supplementary Information

## Reusable Fluorescent Biosensor Based on Morphology- controlled ZIF-8 $\Rightarrow$ FAM-DNA film

Xiaohu Wang,<sup>a</sup> Dongjun Ren,<sup>a</sup> Yangyi Liu,<sup>a</sup> Yunqing Lu,<sup>b</sup> Jin Wang<sup>\*a</sup>

<sup>a</sup> School of Telecommunication and Information Engineering, Nanjing University of  
Posts and Telecommunications, Nanjing 210003, China

<sup>b</sup> College of Electronic and Optical Engineering & College of Flexible Electronics (Future  
Technology), Nanjing University of Posts and Telecommunications, Nanjing, 210023, China

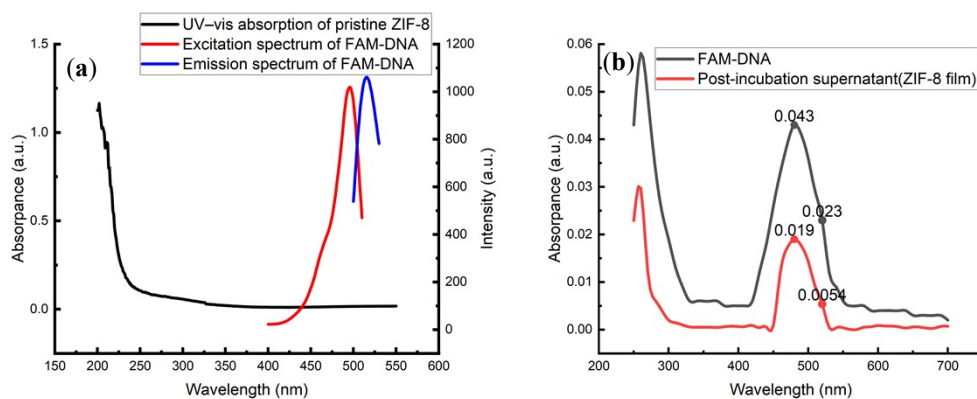

Fig. S1 UV-vis absorption and fluorescence spectra used to evaluate potential inner filter effects (IFE). (a) UV-vis absorption spectrum of pristine ZIF-8 (black) together with the excitation (red) and emission (blue) spectra of FAM-DNA. (b) UV-vis absorption spectra of FAM-DNA solution (black) and the post-incubation supernatant after contacting the ZIF-8 film (red). The absorbance at 480 nm and 520 nm is low (values are labeled in the figure), indicating a negligible IFE under the experimental conditions.

#### Supplementary Notes for the Fig. S1:

1. UV-vis spectra were recorded by using a 1 cm quartz cuvette with the corresponding buffer as blank. The post-incubation supernatant was collected after incubating the ZIF-8 film with FAM-DNA for 60 minutes and removing the film.
2. From Fig.S1, the absorbance at the excitation and emission wavelengths ( $\lambda_{\text{ex}} = 480$  nm,  $\lambda_{\text{em}} = 520$  nm) is low. For FAM-DNA,  $A_{480} = 0.043$  and  $A_{520} = 0.023$  (IFE factor is calculated to be 1.08 by the equation  $\frac{A_{480} + A_{520}}{2}$  (S1)). For the post-incubation supernatant,  $A_{480} = 0.019$  and  $A_{520} = 0.0054$  (IFE factor is 1.03). Thus, IFE would affect the fluorescence intensity by only 3~8%, whereas the observed quenching is 79.4%, indicating that IFE is negligible and cannot account for the pronounced quenching.

$$F_{\text{corr}} = F_{\text{obs}} \times 10^{\frac{A_{480} + A_{520}}{2}} \quad \text{S1}$$

MERGEFORMAT (S1)
